# Supplementary material
Source: PubMed Central journal article supplement (PMC3361449)
Supplement: 1119920109_pnas.201119920SI.pdf [file 1119920109_pnas.201119920SI.pdf]

# Supporting Information

Chen et al. 10.1073/pnas.1119920109

## SI Materials and Methods

**Pyrosequencing.** To analyze point-mutations in *FGFR3* (epithelial form FGFR3 IIIb) and *HRAS* genes, pyrosequencing assays were designed using PSQ Assay Design software v.1.0.6 (Table S3). Gradient PCR was used to optimize annealing temperatures for each assay individually to avoid nonspecific amplification and to achieve the highest PCR product yield. The optimal annealing temperatures were 66 °C for *FGFR3* codon 373, 65 °C for *HRAS* codon 61 and 59 °C for *HRAS* codons 12 and 13. HotStarTaq Plus Master Mix DNA Polymerase kit (Qiagen) was used for PCR amplification as recommended by the manufacturer, with 20–40 ng of DNA per reaction. Before PCR amplification, DNA polymerase was activated by incubation at 95 °C for 5 min. PCR amplification was performed as follows: 94 °C for 45 s (denaturation), optimal annealing temperature for 45 s, 72 °C for 1 min (elongation), for 35 cycles. After incubation at 72 °C for 10 min, products were stored at 4 °C. The purity of the PCR products was evaluated with an e-Gene capillary electrophoresis system.

Pyrosequencing was performed using a Pyromark MD system (Qiagen) according to the manufacturer's protocol. Briefly, 5–10  $\mu\text{L}$  of PCR was incubated with streptavidin-Sepharose beads in binding buffer in a total volume of 80  $\mu\text{L}$  in a 96-well plate. Incubation was performed on rotating platform (1,400 rpm, room temperature) for 10 min. Binding buffer was aspirated with a Vacuum Prep Tool, and the beads were washed consecutively in 70% (vol/vol) ethanol (5 s), 0.2 M NaOH (5 s), and 1 $\times$  washing buffer (5 s), and then transferred into a 96-well pyrosequencing plate containing 12  $\mu\text{L}$  of a 0.33  $\mu\text{M}$  solution of sequencing primer (Table S3) in 1 $\times$  annealing buffer. The plate was incubated at 8 °C for 2 min and then slowly cooled for 10 min at room temperature. The allele quantification mode was used for the pyrosequencing reaction, which allows for accurate allele quantification from ~5% to ~95%. The data were analyzed using PyroMark MD software v.1.0.

**MS Identification of Aristolactam-DNA Adducts.** Renal cortical DNA (74  $\mu\text{g}$  in 5 mM bis-Tris buffer, pH 7.1) was digested with DNase I, nuclease P1, alkaline phosphatase, and spleen phosphodies-

terase for 18 h at 37 °C, followed by solid-phase extraction of the deoxyadenosine (dA)-aristolactam (AL) adducts (1). Isotopically labeled [ $^{15}\text{N}_3$ ]-dA-AL-II was used as an internal standard to estimate the dA-AL-I and dA-AL-II adduct levels, as both adducts displayed comparable ionization efficiencies. The internal standard was added to DNA before enzyme digestion at a level of 4 pg, or 3.2 adducts per  $10^8$  DNA bases.

The chemical identities and quantification of dA-AL adducts were determined using the Velos linear quadrupole ion trap mass spectrometer (Thermo Fisher) interfaced with an 1100 Series capillary LC system (Agilent Technologies) equipped with an Aquasil C18 column (0.32 mm i.d.  $\times$  250 mm, 5- $\mu\text{m}$  particle size; Thermo Fisher). The flow rate was set to 5  $\mu\text{L}/\text{min}$ , using mixtures of (A) 9:1  $\text{H}_2\text{O}/\text{CH}_3\text{CN}$  (high-purity Burdick and Jackson solvents) with 0.01%  $\text{HCO}_2\text{H}$  and (B) 95:1  $\text{CH}_3\text{CN}:\text{H}_2\text{O}$  containing 0.01%  $\text{HCO}_2\text{H}$ . The adducts were resolved with a linear gradient starting at 25% B and reaching 100% B at 20 min.

MS analysis was conducted by electrospray ionization in the positive ionization mode. The capillary temperature was 300 °C and the temperature of the heated electrospray ionization source was set at 150 °C. The sheath gas setting was 11 and the auxiliary gas flow was set at 5 units. Helium was used as the collision damping gas in the ion trap, set at a pressure of 1 mTorr. The automatic gain control settings were full MS target 30,000 and  $\text{MS}^n$  target 10,000. One microscan was used for data acquisition, and the maximum injection time was 10 ms. The acquisition of the data was done with a single segment that contained four different scan events. The  $\text{MS}/\text{MS}^2$  scan mode was used to monitor the loss of deoxyribose from the protonated DNA adducts  $[\text{M}+\text{H}-116]^+$ . The aglycone adduct  $[\text{BH}_2]^+$  underwent fragmentation at the  $\text{MS}^3$  scan stage to obtain full product ion spectra. The following transitions were monitored: dA-AL-I,  $m/z$  543  $\rightarrow$  427  $\rightarrow$  150–500; dA-AL-II,  $m/z$  513  $\rightarrow$  397  $\rightarrow$  150–500; and [ $^{15}\text{N}_3$ ]-dA-AL-II  $m/z$  516  $\rightarrow$  400  $\rightarrow$  150–500. The normalized collision energy and isolation widths were set, respectively, at 25% and  $m/z = 3$  for  $\text{MS}/\text{MS}^2$ , and 35% and  $m/z = 1$  for  $\text{MS}/\text{MS}^3$ . The activation Q was 0.35, and the activation time 10 ms for both  $\text{MS}/\text{MS}^2$  and  $\text{MS}/\text{MS}^3$  scan modes.

1. Goodenough AK, Schut HA, Turesky RJ (2007) Novel LC-ESI/MS/MS<sup>(n)</sup> method for the characterization and quantification of 2'-deoxyguanosine adducts of the dietary

carcinogen 2-amino-1-methyl-6-phenylimidazo[4,5-b]pyridine by 2-D linear quadrupole ion trap mass spectrometry. *Chem Res Toxicol* 20:263–276.

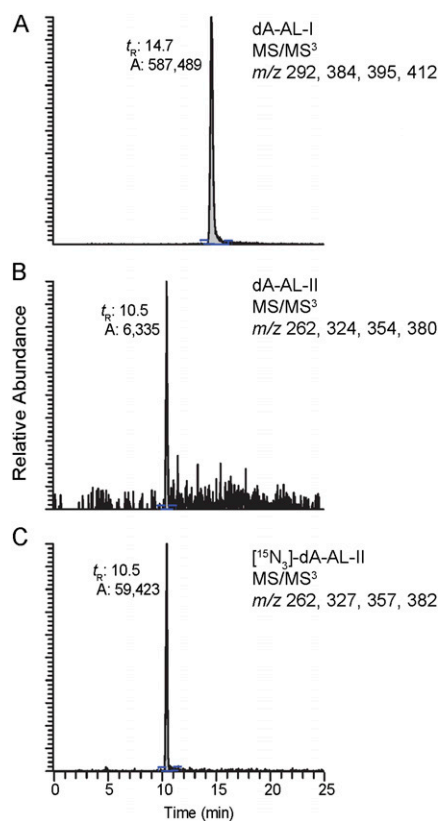

**Fig. S1.** MS characterization of DNA-AL adducts in the renal cortex of a Taiwanese subject with upper urinary tract urothelial cell carcinoma (UUC). Ion chromatograms were reconstructed from liquid chromatography electrospray ionization/multistage mass spectrometry (LC-ESI/MS/MS<sup>3</sup>) analyses of dA-AL adducts. (A) dA-AL-I, identified in renal cortex; (B) dA-AL-II, identified in renal cortex; and (C) internal standard [<sup>15</sup>N<sub>3</sub>]-dA-AL-II spiked into renal cortical DNA at a level of 3.2 adducts per 10<sup>8</sup> DNA bases. The chromatograms were reconstructed with the four principal fragment ions observed in the spectra of the MS<sup>3</sup> scan stage (Fig. 3). The dA-AL-I level was estimated at 316 adducts/10<sup>9</sup> bases (based on total ion counts of dA-AL-I to [<sup>15</sup>N<sub>3</sub>]-dA-AL-II total ion counts), and the amount of dA-AL-II was estimated at 3.4 adducts/10<sup>9</sup> bases.

**Table S1. TP53 mutations detected in Taiwan UUC samples (individual data)**

| Patient no. | Codon/AA change | Mutation | Patient no. | Codon/AA change | Mutation |
|-------------|-----------------|----------|-------------|-----------------|----------|
| 1           | Int 4           | A→T      | 42          | N131Y           | AAC→TAC  |
|             | Int 7           | A→T      |             | N288S           | AAT→AGT  |
| 2           | K164X           | AAG→TAG  |             | Int 8           | A→T      |
|             | Int 8           | A→T      | 43          | Int 8           | A→T      |
| 4           | P98L            | CCT→CTT  |             | R209X           | AGA→TGA  |
|             | Y220C           | TAT→TGT  | 44          | R209X           | AGA→TGA  |
| 6           | 240 or 241      | ΔT       | 47          | S183X           | TCA→TGA  |
| 7           | R248Q           | CGG→CAG  | 48          | G325X           | GGA→TGA  |
| 8           | G187S           | GGT→AGT  |             | Int 6           | A→T      |
|             | H214R           | CAT→CGT  | 49          | I195T           | ATC→ACC  |
|             | L383F           | CTC→TTC  | 52          | R249W           | AGG→TGG  |
| 10          | S183X           | TCA→TGA  | 53          | Int 7           | A→T      |
| 12          | I195T           | ATC→ACC  | 56          | K132M           | AAG→ATG  |
| 13          | Int 6           | A→T      | 61          | D259V           | GAC→GTC  |
|             | Int 7           | A→T      | 63          | R249W           | AGG→TGG  |
| 15          | N131Y           | AAC→TAC  | 64          | N131Y           | AAC→TAC  |
| 16          | V172F           | GTT→TTT  | 65          | Int 3           | A→T      |
| 17          | Q104L           | CAG→CTG  |             | R249W           | AGG→TGG  |
| 20          | E204X           | GAG→TAG  | 69          | E326K           | GAA→AAA  |
| 21          | V31I            | GTT→ATT  | 70          | E171Q           | GAG→CAG  |
| 23          | G244D           | GGC→GAC  |             | E224X           | GAG→TAG  |
| 24          | R248L           | CGG→CTG  |             | M246L           | ATG→TTG  |
| 25          | Q331X           | CAG→TAG  |             | K319N           | AAG→AAT  |
| 27          | V31I            | GTT→ATT  | 74          | E271V           | GAG→GTG  |
|             | G244D           | GGC→GAC  | 78          | H214R           | CAT→CGT  |
| 28          | Int 8           | A→T      |             | Y220C           | TAT→TGT  |
| 29          | M340I           | ATG→ATA  | 79          | H214Y           | CAT→TAT  |
| 30          | Int 6           | A→T      | 80          | Int 6           | A→T      |
| 31          | P47P            | CCG→CCA  | 81          | K291X           | AAG→TAG  |
| 32          | Q38L            | CAA→CTA  | 82          | R282W           | CGG→TGG  |
| 34          | Int 8           | A→T      | 83          | Int 9           | A→T      |
| 36          | E258Q           | GAA→CAA  | 87          | N239I           | AAC→ATC  |
|             | Int 7           | A→G      | 89          | V143E           | GTG→GAG  |
| 37          | R196X           | CGA→TGA  | 93          | Y205C           | TAT→TGT  |
|             | Q375X           | CAG→TAG  | 94          | K120M           | AAG→ATG  |
| 38          | I195F           | ATC→TTC  |             | Int 8           | A→T      |
| 39          | R209X           | AGA→TGA  | 95          | P87P            | CCA→CCT  |
|             | K320X           | AAG→TAG  |             | K292X           | AAA→TAA  |
| 40          | E286V           | GAA→GTA  |             | Int 5           | A→T      |
| 41          | Y163C           | TAC→TGC  | 102         | R280S           | AGA→AGT  |
| 103         | I162F           | ATC→TTC  | 145         | R280S           | AGA→AGT  |
| 105         | I162F           | ATC→TTC  | 149         | P152S           | CCG→TCG  |
|             | R273C           | CGT→TGT  | 152         | Q136L           | CAA→CTA  |
| 108         | E294X           | GAG→TAG  | 153         | R280T           | AGA→ACA  |
| 112         | N131Y           | AAC→TAC  | 154         | K164X           | AAG→TAG  |
|             | Int 3           | A→T      | 157         | R248L           | CGG→CTG  |
| 113         | Int 8           | A→T      | 159         | R283H           | CGC→CAC  |
| 114         | K305X           | AAG→TAG  | 161         | R174W           | AGG→TGG  |
| 115         | Y220H           | TAT→CAT  |             | Int 2           | A→T      |
| 116         | Q331X           | CAG→TAG  | 162         | R202C           | CGT→TGT  |
| 122         | K132X           | AAG→TAG  | 163         | Int 5           | A→T      |
| 131         | Int 10          | A→T      | 164         | L111L           | CTG→CTT  |
| 134         | K305X           | AAG→TAG  |             | E180X           | GAG→TAG  |
| 135         | E198X           | GAA→TAA  | 167         | R158L           | CGC→CTC  |
| 141         | K120M           | AAG→ATG  |             | R267L           | CGG→CTG  |
|             | R249W           | AGG→TGG  |             | L350L           | CTC→CTG  |
| 144         | E346X           | GAG→TAG  |             |                 |          |

A→T and T→A transversions are indicated by green and yellow backgrounds, respectively. AA, amino acid.

**Table S2. Individual data for *HRAS* and *FGFR3* mutations**

| Patient no.          | <i>TP53</i>     | <i>HRAS</i> Codon 61 CAG         | <i>FGFR3</i> Codon 373 AGT        |
|----------------------|-----------------|----------------------------------|-----------------------------------|
| 15                   | <b>A &gt; T</b> | <b>A &gt; T</b>                  |                                   |
| 22                   | WT              | <b>A &gt; T</b>                  |                                   |
| 26                   | WT              | <b>A &gt; T</b>                  |                                   |
| 52                   | <b>A &gt; T</b> | <b>A &gt; T</b>                  |                                   |
| 60                   | WT              | <b>A &gt; T</b>                  |                                   |
| 74                   | <b>A &gt; T</b> | <b>A &gt; T</b>                  |                                   |
| 86                   | WT              | <b>A &gt; T</b>                  |                                   |
| 31                   | <b>G &gt; A</b> |                                  | <b>A &gt; T</b>                   |
| 33                   | WT              |                                  | <b>A &gt; T</b>                   |
| 40                   | <b>A &gt; T</b> |                                  | <b>A &gt; T</b>                   |
| 41                   | <b>A &gt; G</b> |                                  | <b>A &gt; T</b>                   |
| 88                   | WT              |                                  | <b>A &gt; T</b>                   |
| 123                  | WT              |                                  | <b>A &gt; T</b>                   |
| Mutational frequency |                 | <b>4.7% (A &gt; T) (7/150)</b>   | <b>4.0% (A &gt; T) (6/150)</b>    |
| COSMIC Mut. Freq.    |                 | <b>1.1% (A &gt; T) (12/1123)</b> | <b>0.78% (A &gt; T) (28/3574)</b> |

DNA obtained from upper urinary tract tumors from 150 Taiwanese subjects was available for pyrosequencing analysis of *HRAS* and *FGFR3* mutations. A > T mutations are in boldface type and shaded in green; G > A and A > G mutations are shaded in orange and yellow, respectively. COSMIC, Catalogue Of Somatic Mutations In Cancer, <http://www.sanger.ac.uk/genetics/CGP/cosmic> using transitional cell carcinoma as a search term.

**Table S3. Primers used for pyrosequencing**

| Assay no. | Forward primer         | Reverse primer          | Sequencing primer | Codons and nucleotide positions analyzed                   |
|-----------|------------------------|-------------------------|-------------------|------------------------------------------------------------|
| 1         | TTGCAGCCGAGGAGGAGC     | Bio-GGGAGCCC AGGCCTTCTT | GAGGCTGACGAGGCG   | <i>FGFR3</i> 373 (nt 1117)                                 |
| 2         | GGGAGACGTGCCTGTTGGA    | Bio-GCGCATGT ACTGGTCCCG | TCCTGGATACCGCCG   | <i>HRAS</i> 61 (nt 182)                                    |
| 3         | CTGAGGAGCGATGACGGAATAT | Bio-GGATGGTC AGCGACTCTT | TGGTGGTGGTGGGCG   | <i>HRAS</i> 12 (nts 34, 35)<br><i>HRAS</i> 13 (nts 36, 37) |

Bio, biotin was added to the 5'-end of the reverse PCR primers in each pair to facilitate the isolation of a single DNA strand from the PCR product for pyrosequencing; nt, nucleotide position.
